# Supplementary material for: Achievement of Target A1C &lt;7.0% (&lt;53 mmol/mol) by U.S. Type 2 Diabetes Patients Treated With Basal Insulin in Both Randomized Controlled Trials and Clinical Practice
Source: Oxford University Press journal article supplement (doi:10.2337/ds17-0082), 2018-10-17

**SUPPLEMENTARY MATERIALS
TABLE S1.** Summary of Randomized Controlled Trial Studies Analyzed

| **Study, year (ref)** | **Treatment duration**  **(weeks)** | **Patient count treatment/comparator**  **(n)** | **Treatment**  ***n* (%)** | **Comparator**  ***n* (%)** |
| --- | --- | --- | --- | --- |
| Gerstein, 2006 (13) | 26 | 390/405 | Insulin glargine  197 (50.5) | OADs  193 (49.5) |
| Riddle, 2003 (14) | 28 | 735/764 | Insulin glargine  355 (48.30) | NPH insulin  380 (51.7) |
| Standl, 2005 (15) | 24 | 624 | Insulin glargine + glimepiride  (morning vs bedtime)  624 | NA |
| Rosenstock, 2006 (16) | 24 | 216/219 | Insulin glargine  104 (48.1) | Rosiglitazone  112 (51.9) |
| Meneghini, 2010 (17) | 24/48 | 336/353 | Insulin glargine  159 (47.3) | Pioglitazone  177 (52.7) |
| Data on file, HOE-901-4021 | 24 | 209/212 | Insulin glargine  12 (53.6) | Lispro 75/25 insulin  97 (46.4) |
| Janka, 2005 (18) | 28 | 354/371 | Insulin glargine  174 (49.2) | NPH 30/70 insulin  180 (50.8) |
| Bretzel, 2008 (19) | 44 | 402/415 | Insulin glargine  198 (49.3) | Lispro insulin  204 (50.7) |
| Yki-Järvinen, 2007 (20) | 24 | 121 | Insulin glargine  121 | NA |
| Blicklé, 2009 (21) | 40 | 183/215 | Insulin glargine  100 (54.6) | Hygienic and dietary measures  83 (45.4) |
| Yki-Järvinen, 2006 (22) | 36 | 110 | Insulin glargine  61 (55.5) | NPH  49 (44.5) |

NA, not applicable; OAD, oral antihyperglycemic drugs.


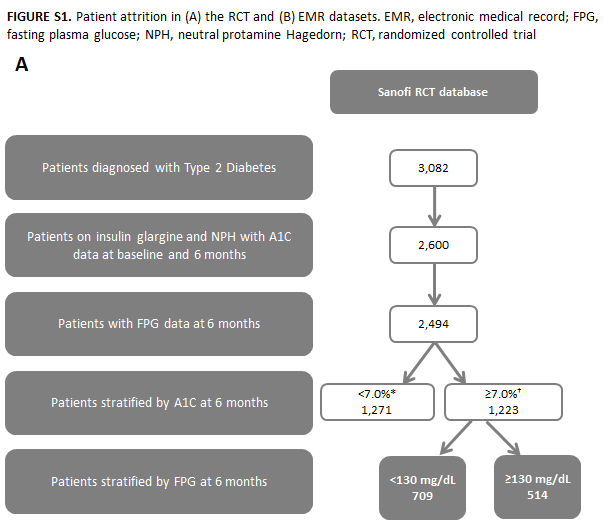


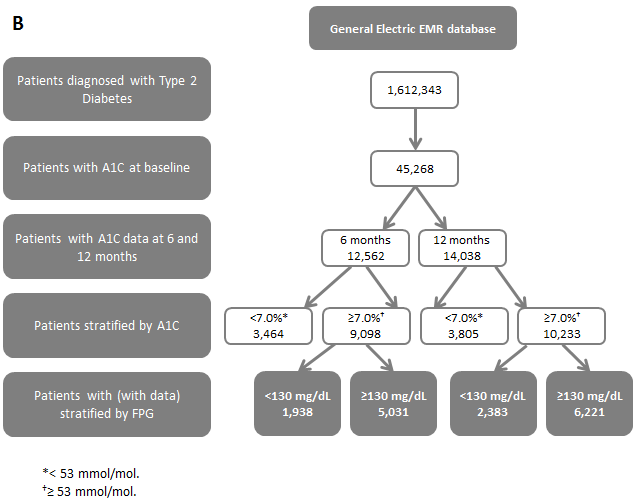

Supplement: ds170082supplementarydata.docx [file ds170082supplementarydata.docx]
